# Supplementary material
Source: MDPI journal article supplement (https://www.mdpi.com/2071-1050/12/9/3769)

**Host genus**

**Ecoregion**

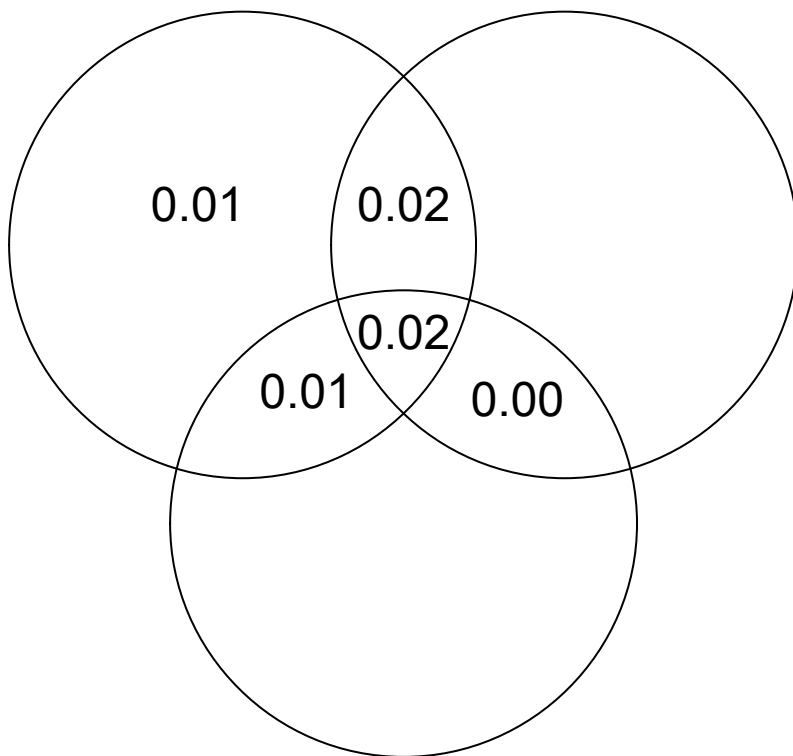

**Photobiont type**

Residuals = 0.94

Values <0 not shown

Supplement: s1 [file s1]

a

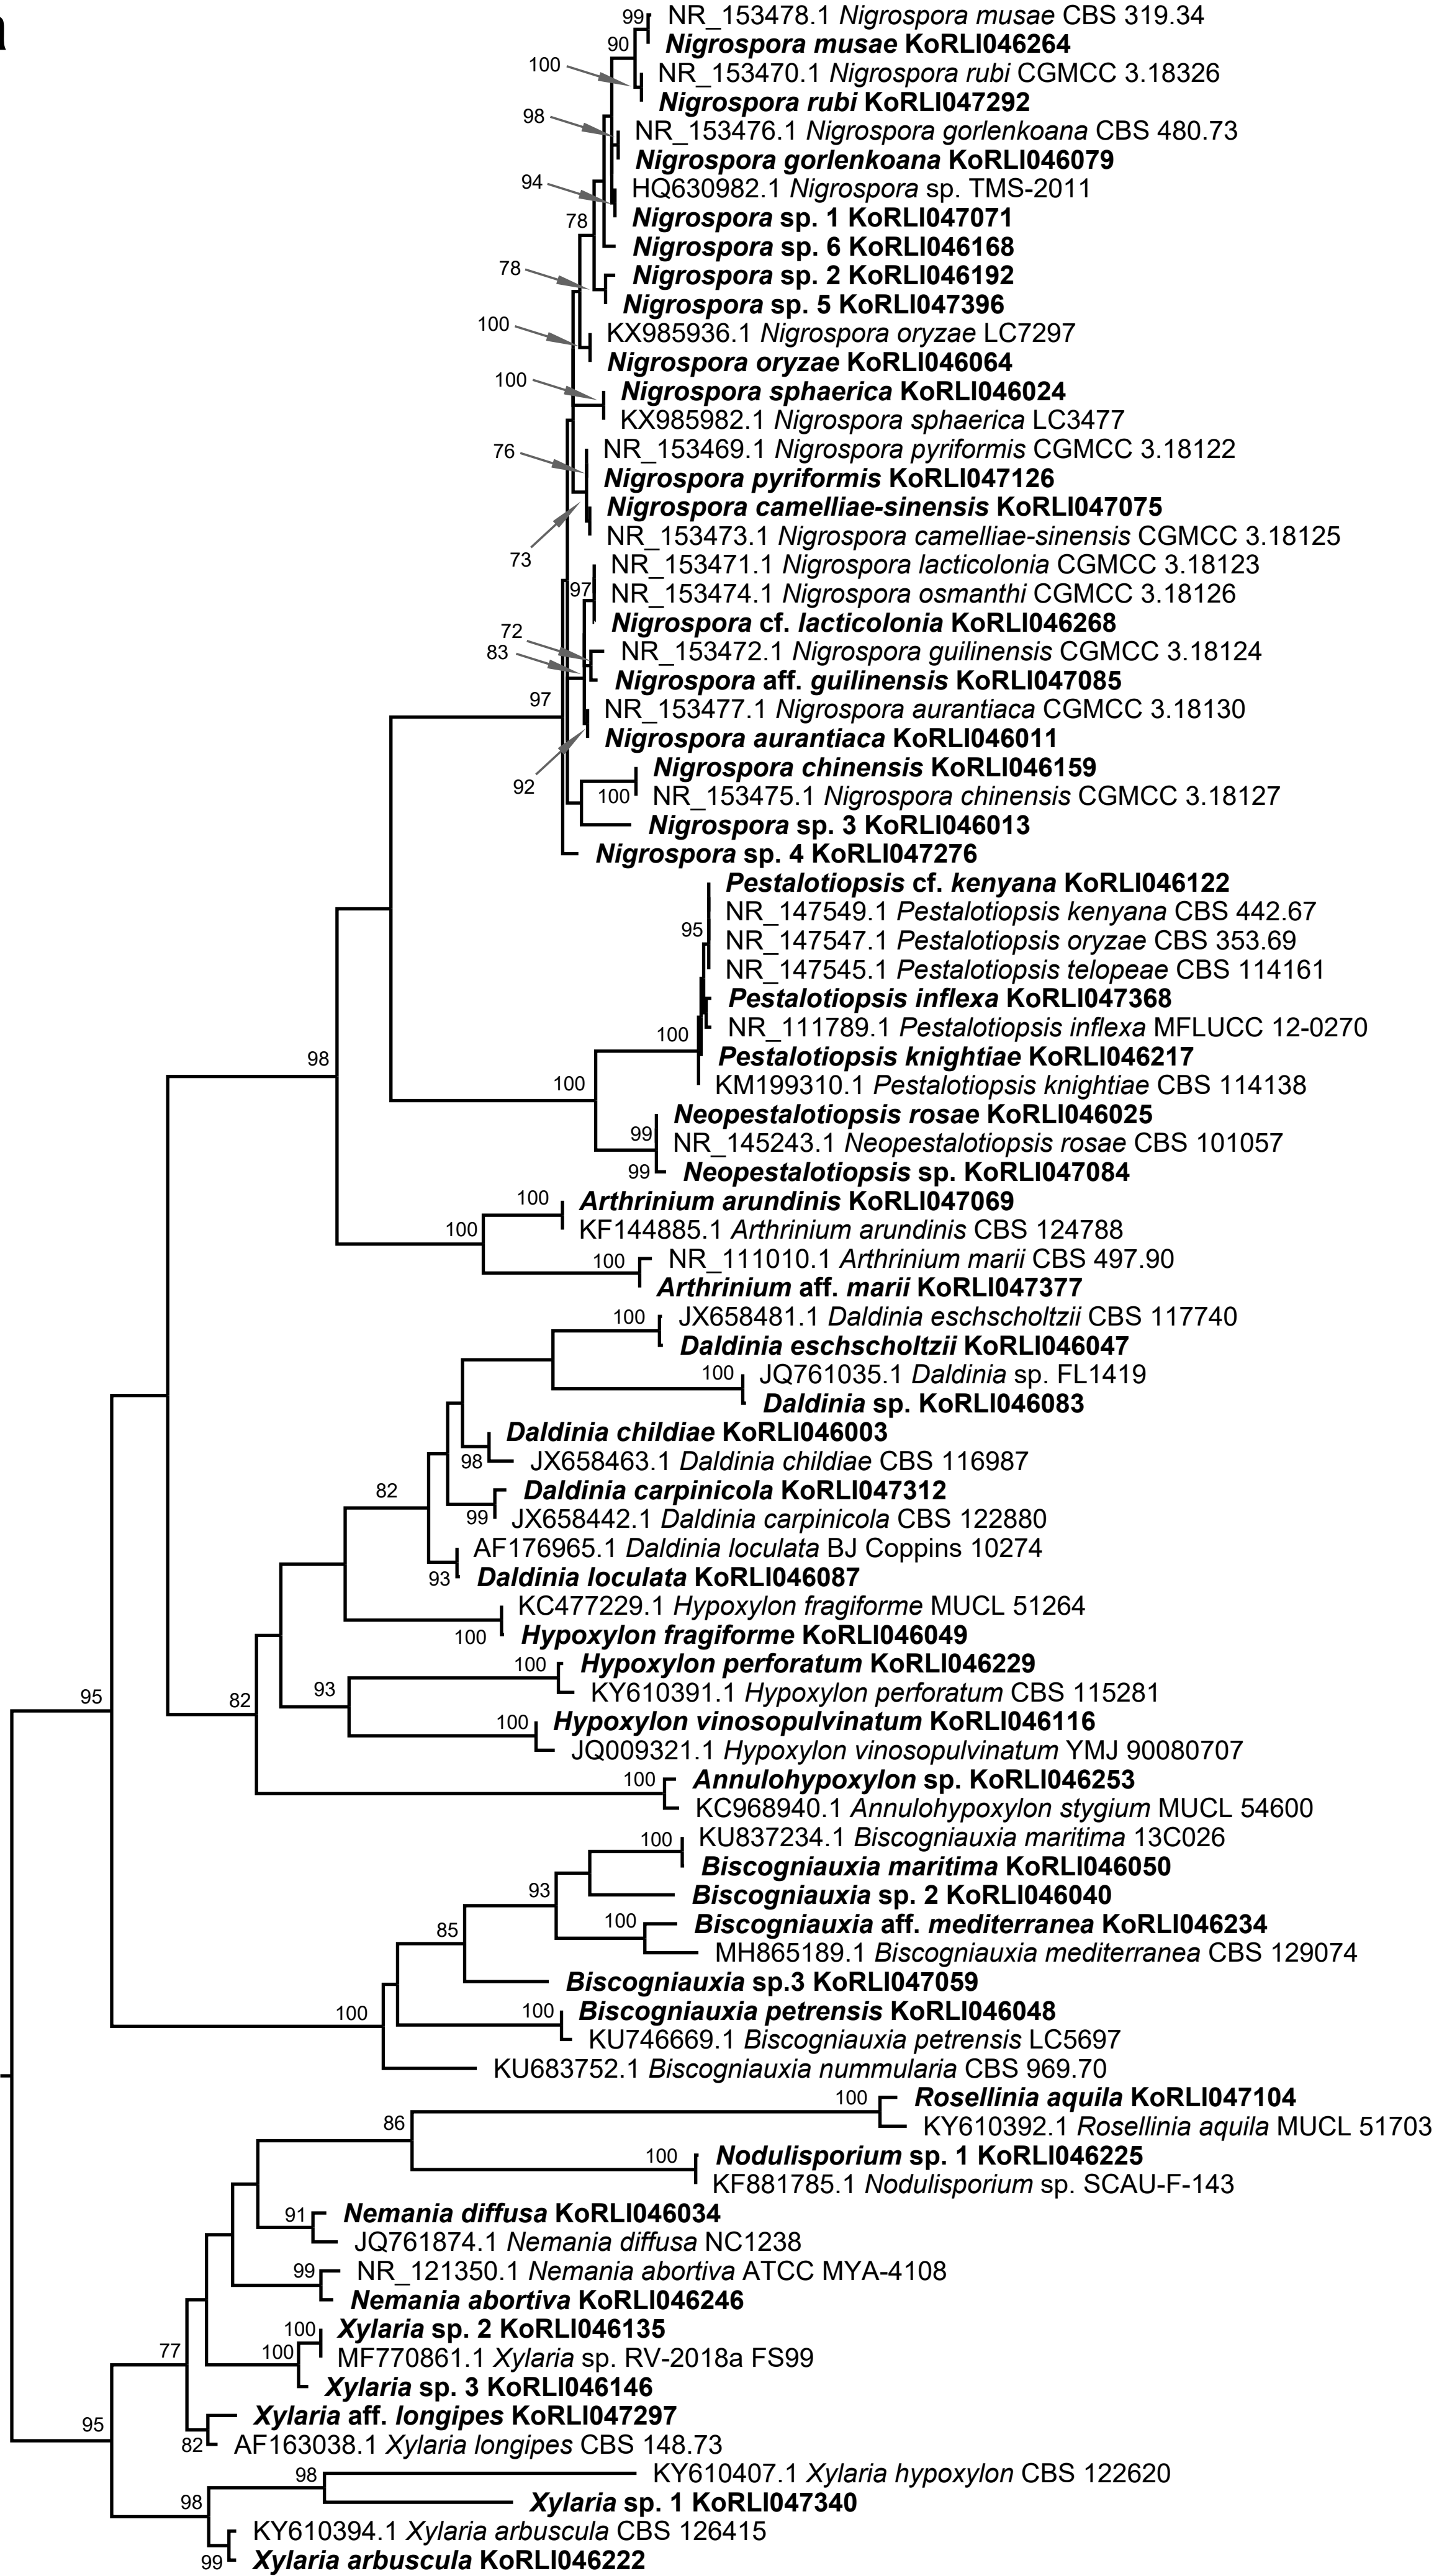

b

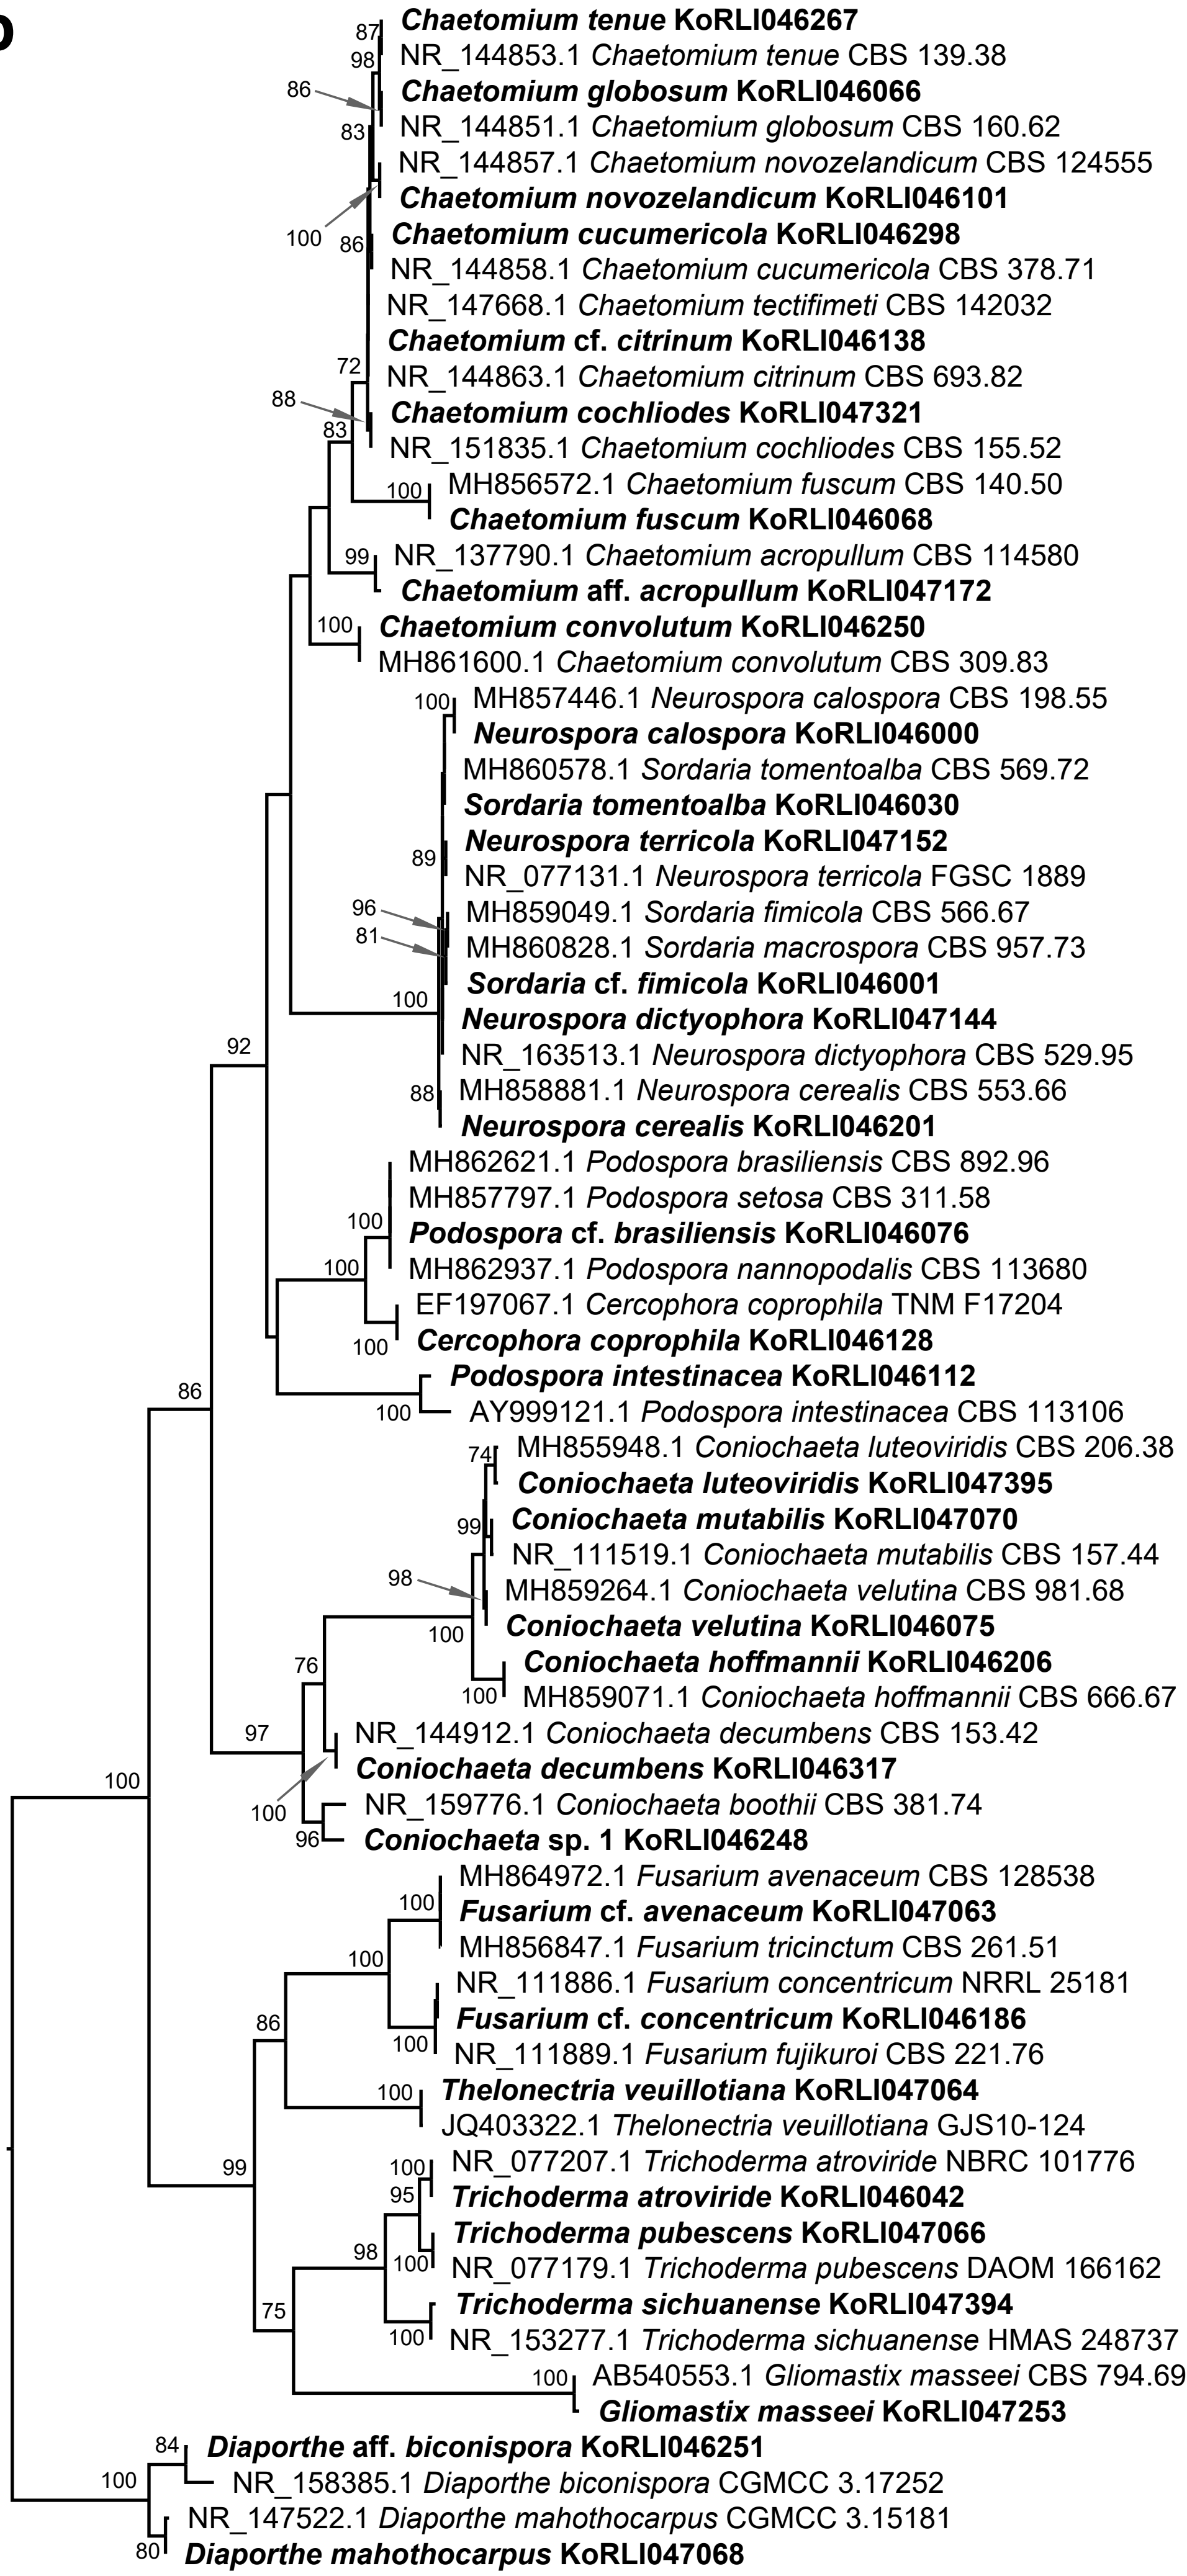

0.2

0.1

Supplement: s1 [file s1]

**a**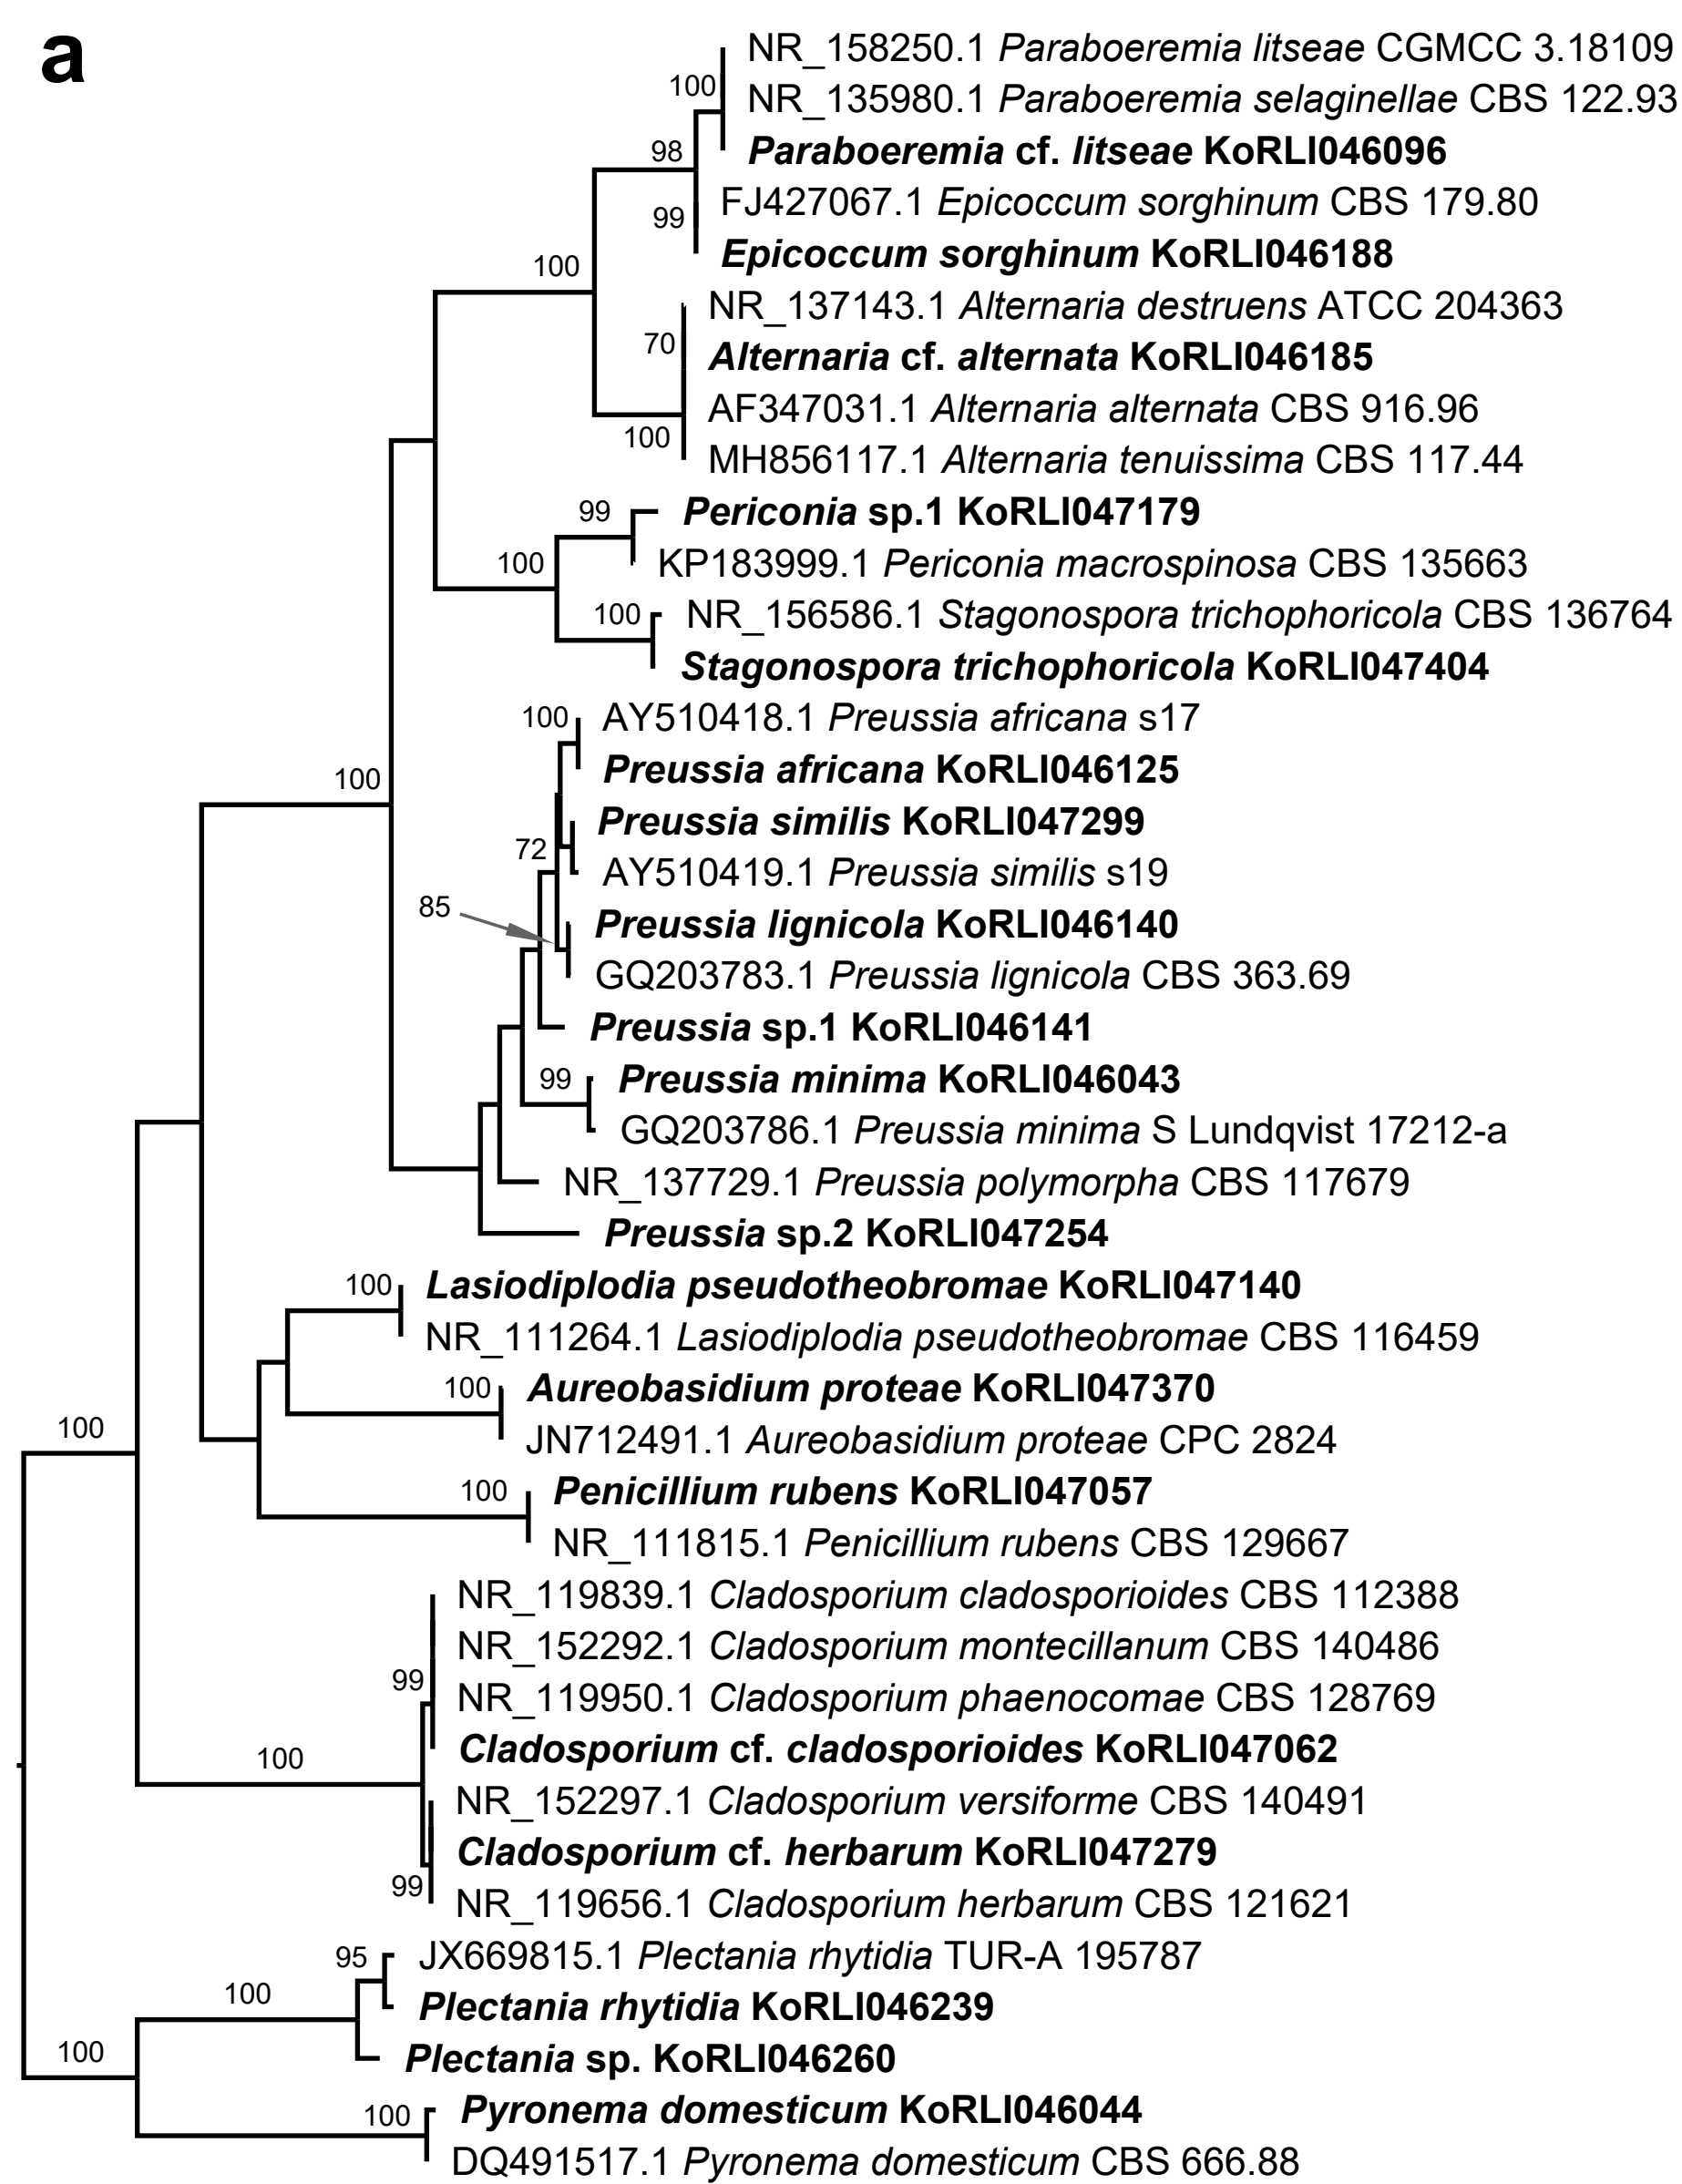**b**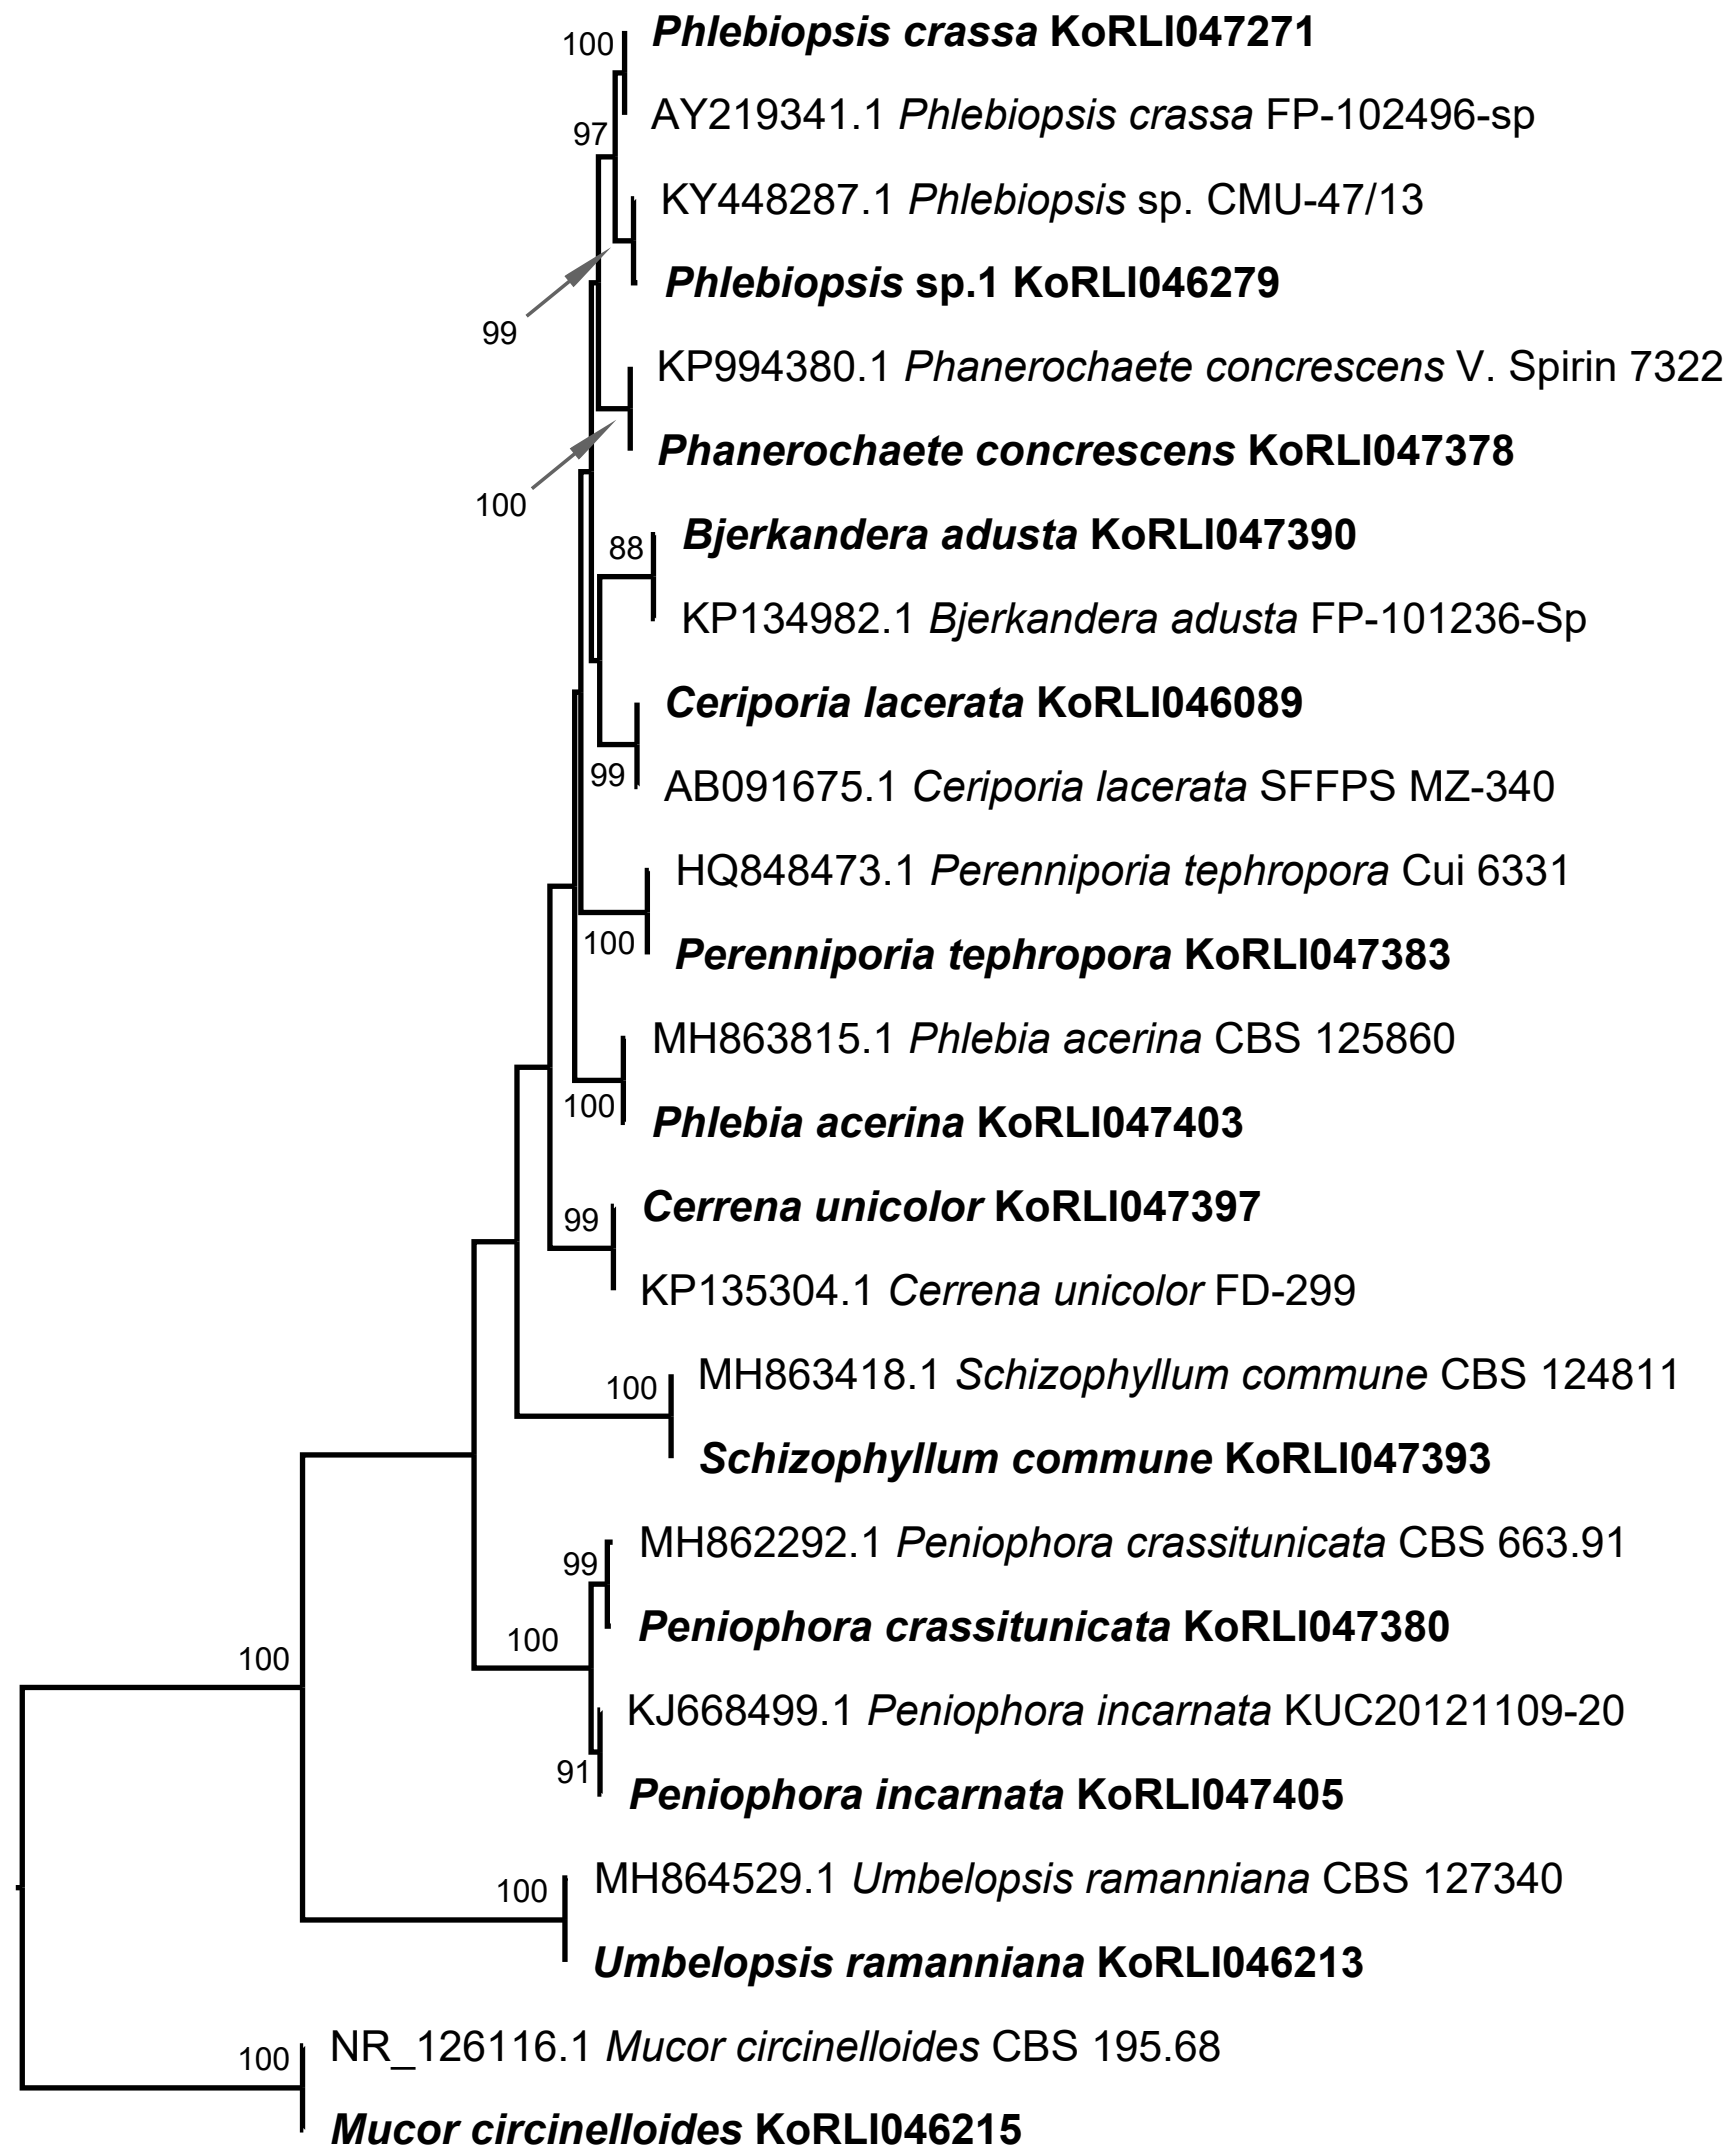

Supplement: s1 [file s1]
